## **Rapid spatial Expansion Beyond the Amazon Basin: Oropouche Virus joins other main arboviruses in epidemic activity across the Americas**

Felipe Campos de Melo Iani<sup>1^</sup>, Felicidade Mota Pereira<sup>2^</sup>, Elaine Cristina de Oliveira<sup>3^</sup>, Janete Taynã Nascimento Rodrigues<sup>4^</sup>, Mariza Hoffmann Machado<sup>5^</sup>, Vagner Fonseca<sup>6-8^</sup>, Talita Emile Ribeiro Adelino<sup>1</sup>, Natália Rocha Guimarães<sup>1,8</sup>, Luiz Marcelo Ribeiro Tomé<sup>1,8</sup>, Marcela Kelly Astete Gómez<sup>2</sup>, Vanessa Brandão Nardy<sup>2</sup>, Adriana Aparecida Ribeiro<sup>1</sup>, Alexander Rosewell<sup>9</sup>, Álvaro Gil A. Ferreira<sup>8</sup>, Arabela Leal e Silva de Mello<sup>2</sup>, Brenda Machado Moura Fernandes<sup>4</sup>, Carlos Frederico Campelo de Albuquerque<sup>9</sup>, Dejanira dos Santos Pereira<sup>3</sup>, Eline Carvalho Pimentel<sup>2</sup>, Fábio Guilherme Mesquita Lima<sup>4</sup>, Fernanda Viana Moreira Silva<sup>1</sup>, Glauco de Carvalho Pereira<sup>1</sup>, Houriiyah Tegally<sup>7</sup>, Júlia Deffune Profeta Cidin Almeida<sup>3</sup>, Keldenn Melo Farias Moreno<sup>10</sup>, Klaucia Rodrigues Vasconcelos<sup>3</sup>, Leandro Cavalcante Santos<sup>4</sup>, Livia Cristina Machado Silva<sup>1</sup>, Livia C. V. Frutuoso<sup>11</sup>, Ludmila Oliveira Lamounier<sup>1</sup>, Mariana Araújo Costa<sup>4</sup>, Marília Santini de Oliveira<sup>12</sup>, Marlei Pickler Dediasi dos Anjos<sup>5</sup>, Massimo Ciccozzi<sup>13</sup>, Maurício Teixeira Lima<sup>10</sup>, Maira Alves Pereira<sup>1</sup>, Marília Lima Cruz Rocha<sup>1</sup>, Paulo Eduardo de Souza da Silva<sup>1</sup>, Peter Rabinowitz<sup>14</sup>, Priscila Souza de Almeida<sup>1</sup>, Richard Lessels<sup>15</sup>, Ricardo T. Gazzinelli<sup>16</sup>, Rivaldo Venâncio da Cunha<sup>17</sup>, Sabrina Gonçalves<sup>5</sup>, Sara Cândida Ferreira dos Santos<sup>1</sup>, Senele Ana de Alcântara Belettini<sup>5</sup>, Silvia Helena Sousa Pietra Pedroso<sup>1</sup>, Sofia Isabel Rótulo Araújo<sup>5</sup>, Stephanni Figueiredo da Silva<sup>3</sup>, Wes Van Voorhis<sup>18</sup>, Darren P. Martin<sup>19</sup>, Edward C. Holmes<sup>20</sup>, Tulio de Oliveira<sup>21</sup>, José Lourenço<sup>22,23</sup>, Luiz Carlos Junior Alcantara<sup>8\*</sup>, Marta Giovanetti<sup>24,25\*</sup>.

1. Central Public Health Laboratory of the State of Minas Gerais, Ezequiel Dias Foundation, Brazil; 2. Central Public Health Laboratory of the State of Bahia, Brazil; 3. Central Public Health Laboratory of the State of Mato Grosso, Brazil; 4. Central Public Health Laboratory of the State of Acre, Brazil; 5. Central Public Health Laboratory of the State of Santa Catarina, Brazil; 6. Department of Exact and Earth Sciences, University of the State of Bahia, Salvador, Brazil; 7. Centre for Epidemic Response and Innovation (CERI), School of Data Science and Computational Thinking, Stellenbosch; 8. René Rachou Institute, Oswaldo Cruz Foundation, Belo Horizonte, Brazil University; Stellenbosch, South Africa; 9. Organização Pan-Americana da Saúde, Organização Mundial da Saúde, Brazil; 10. Institute of Biological Sciences, Federal University of Minas Gerais, Belo Horizonte, Brazil; 11. Coordenadora-Geral de Vigilância de Arboviroses, Brazilian Ministry of Health, Brazil; 12. Coordenadora-Geral de Laboratórios de Saúde Pública, Brazilian Ministry of Health, Brazil; 13. Unit of Medical Statistics and Molecular Epidemiology, University Campus Bio-Medico of Rome, Italy; 14. Environmental and Occupational Health Sciences, University of Washington, USA; 15. KwaZulu-Natal Research Innovation and Sequencing Platform (KRISP), Nelson R Mandela School of Medicine, University of KwaZulu-Natal, Durban 4001, South Africa; 16. Fundação Oswaldo Cruz - Minas, Laboratory of Immunopathology, Belo Horizonte, MG, Brazil; 17. Fundação Oswaldo Cruz, Bio-Manguinhos, Rio de Janeiro, Rio de Janeiro, Brazil; 18. Center for Emerging and Re-emerging Infectious Diseases (CERID), University of Washington; 19. Computational Biology Division, Department of Integrative Biomedical Sciences, Institute of Infectious Disease and Molecular Medicine, Faculty of Health Sciences, University of Cape Town, Cape Town, South Africa; 20. Marie Bashir Institute for Infectious Diseases and Biosecurity, School of Life and Environmental Sciences and School of Medical Sciences, University of Sydney, Sydney, NSW, Australia; 21. School for Data Science and Computational Thinking, Faculty of Science and Faculty of Medicine and Health Sciences,

Stellenbosch University, South Africa; 22. Universidade Católica Portuguesa, Católica Medical School, Católica Biomedical Research Centre, Portugal; 23. Climate amplified diseases and epidemics (CLIMADE) Europe, Portugal; 24. Department of Sciences and Technologies for Sustainable Development and One Health, Università Campus Bio-Medico di Roma, Italy; 25. Oswaldo Cruz Institute, Oswaldo Cruz Foundation, Minas Gerais, Brazil.

^Denote equal contributions

## Abstract

**Summary:** The Oropouche virus, initially detected in Trinidad and Tobago in 1955, has been historically confined to the Amazon Basin. However, since late 2022, it has been reported elsewhere, from northern Brazil to urban centers in Bolivia, Colombia, Cuba, and Peru. In this report we describe the doubling of publicly available full genomes by generating 133 new entries. We show how the virus evolved via recombination and how it rapidly spread across multiple states in Brazil, causing the largest outbreak ever recorded outside the Amazon basin including the first ever detected deaths. This work highlights the need for heightened epidemiological and genomic surveillance and the implementation of adequate responses in order to avoid Oropouche becoming another widespread arboviral public health threat.

**Background:** The Oropouche virus was first identified in 1955 in Trinidad and Tobago and later found in Brazil in 1960. Historically, it has been reported to have caused around 30 outbreaks, most of which within the Amazon Basin where it circulates among forest animals, but also in urban areas where it is known to be transmitted by the midge *Culicoides paraensis*. Recently, Brazil has seen a surge in cases, with 6000 reported by mid-2024 alone.

**Methods:** In a collaboration with Central Public Health Laboratories across Brazilian regions, we integrated epidemiological metadata with genomic analyses of recently sampled cases. This initiative resulted in the generation of 133 whole genome sequences from the three genomic segments (L, M, and S) of the virus, including the first genomes obtained from regions outside the Amazon and from the first ever recorded fatal cases.

**Findings:** All of the 2024 genomes form a monophyletic clade in the phylogenetic tree with sequences from the Amazon Basin sampled since 2022. Our analyses reveal a fast and clear pattern of north-to-south viral movement from the Amazon Basin into historically non-endemic regions. We identified 21 recombinant events, but it remains unclear if such genomic changes mirror potential adaptations and the emergence of new viral phenotypes of public health importance.

**Interpretation:** Both the recent rapid spatial expansion and the first reported fatalities associated with Oropouche underscore the importance of enhancing surveillance at both national and continental levels. Without any obvious changes in the human population over the past 2 years, it remains likely that either alone or in combination, viral adaptation, deforestation and climate change trends in the recent past may have propelled the Oropouche virus beyond the Amazon Basin.

**Keywords:** OROV, Brazil, genomic surveillance, Amazon basin.

**Corresponding:** [luiz.alcantara@fiocruz.br](mailto:luiz.alcantara@fiocruz.br); [giovanetti.marta@gmail.com](mailto:giovanetti.marta@gmail.com).

## Research in context.

**Evidence before this study:** Before this study, the Oropouche virus was known to cause periodic outbreaks primarily within the Amazon Basin. Initially identified in Trinidad and Tobago in 1955, the virus had been responsible for approximately 30 outbreaks in Latin America, mostly confined to the Amazon region. The virus typically circulates among forest animals and is transmitted to humans by the bite of the midge *Culicoides paraensis*. There has been an historical dearth of available genomic data, and so far the spread beyond the Amazon Basin has not been well-documented.

**Added value of this study:** This study provides a timely and comprehensive analysis of epidemiological and genomic data of the Oropouche virus from regions outside the Amazon Basin. By generating 133 whole genome sequences from various regions across Brazil, the study doubles the number of publicly available genomes. Our findings reveal the virus' movement over the past few years across Brazil, highlighting a north-south spatial trend from regions of historic endemicity to regions with clear epidemic potential. We identify 21 recombinant events, of which the potential for adaptation and the emergence of novel viral phenotypes remains possible but unclear. This study also reports the first fatal cases of Oropouche virus infection in patients without underlying relevant comorbidities, underscoring the public health risk of future outbreaks and the need for increased awareness and surveillance.

**Implications of all the available evidence:** The rapid spread of the Oropouche virus beyond the Amazon Basin into regions of Brazil further away than 3500 Km, coupled with the identification of genome recombinant events, raises the possibility that the virus is adapting to the new environments of its increasing spatial landscape. This evolution could lead to the emergence of new viral phenotypes, with potential changes at various levels, from vector efficiency, to disease outcome, raising the challenge of managing future outbreaks. The evidence underscores the critical need for enhanced surveillance systems at national and continental levels, in particular in urban centers which appear to have been particularly hit during the spatial expansion, to detect and respond to Oropouche virus outbreaks promptly.

## Introduction

The Oropouche virus (OROV) is an arthropod-borne virus classified within the order *Bunyavirales*, family *Peribunyaviridae* and genus *Orthobunyavirus*, specifically the species *Orthobunyavirus oropoucheense* (1). It encodes a negative-sense, single-stranded RNA which is divided into three segments based on size: S (small), M (medium) and L (large). These segments code for four structural proteins: the nucleocapsid, two external glycoproteins, and the RNA polymerase (2). OROV was first identified in 1955 in Oropouche, a village in Trinidad and Tobago (3). Since then, the virus has been responsible for numerous outbreaks, mostly within the Amazon Basin, where it is found among forest animals such as non-human primates, sloths, and birds (4). The midge *Culicoides paraensis* is the primary vector for human transmission. Infection with OROV causes Oropouche fever, which typically presents as fever, headache, muscle and joint pain (5). The majority of human infections present as mild to moderate disease and resolve within a week, though rare cases can lead to complications like aseptic meningitis (6).

Historically, OROV outbreaks were largely restricted to the Amazon region, with about 30 outbreaks reported in Latin America up until recent years (7). However, new epidemiological data show a marked increase in Oropouche fever cases in Brazil, Cuba, Bolivia, Colombia, and Peru. Notably, Brazil alone reported a total number of more than 6,000 cases this year (up to July 2024) compared to 836 in 2023, indicating a significant rise in transmission (8-10). The country has also reported the first three fatal cases associated with OROV infection in 2024, raising concerns among health authorities (11). OROV has also recently appeared in historically non-endemic Brazilian regions outside the Amazon, including in the far south and, importantly, in some urban centers on the east coast (11). As is the case for other arboviruses (12), recent changes in disease ecology, such as deforestation, urbanization, human mobility and climate change, are some of the possible drivers of the virus' recent success in escaping the Amazon region (13, 14). Local reservoir habitats belonging to non-human mammals and vectors can be disrupted, pushing them into closer contact with each other and with urban and peri-urban areas where humans can be infected. In addition, human mobility favors long distance viral movements. Additionally, ongoing changes in OROV genetic diversity may also result in changes to its virulence and transmission potential (15).

Scientific and surveillance data for OROV are currently limited, with fewer than 59 peer-reviewed publications compared to thousands for other arboviruses such as Zika or Dengue. Reports of recent increases in OROV epidemic activity underscore the urgent need for more data and research. Some of the epidemic activity over the past decade has provided valuable insights into OROV epidemiological characteristics, as well as its potential for public health impact. Aiming at contributing to current knowledge gaps and following recent epidemic activity in the south of Brazil, in collaboration with several Central Public Health Laboratories, we generated 133 genome sequences including all three segments (L, M, and S). We provide a genomic analysis that offers insights into OROV's recent movement from northern to southern Brazil and its emergence in regions, within and outside the country, classically not associated with epidemic activity.

## Methods

### Ethics statement

This project was reviewed and approved by the Ethical Committee of the Federal University of Minas Gerais (CAAE: 32912820.6.1001.5149). The availability of the samples for research purposes during outbreaks of national concern is allowed by the terms of the 510/2016 Resolution of the National Ethical Committee for Research (CONEP - Comissão Nacional de Ética em Pesquisa, Ministério da Saúde) of the Brazilian Ministry of Health (BrMoH), that authorize, without the necessity of an informed consent, the use of clinical samples collected in the Brazilian Central Public Health Laboratories to accelerate knowledge building and contribute to surveillance and outbreak response. The samples processed in this study were obtained anonymously from material collected during routine arboviral diagnosis in Brazilian public health laboratories within the BrMoH network.

## **Sample collection and molecular diagnostic screening**

Clinical samples from patients with suspected OROV infection were obtained for routine diagnostic purposes at local health services in five different Brazilian federal states (Minas Gerais, Bahia, Mato Grosso, Acre and Santa Catarina). Samples were collected between February and May 2024. Viral RNA was extracted from serum samples using an automated protocol and tested by RT-qPCR for detection of OROV based on an assay by Naveca et al (2017) (16).

## **cDNA synthesis and whole genome sequencing**

Samples were selected for sequencing based on the CT value ( $\leq 36$ ) and availability of epidemiological metadata, such as date of symptom onset, date of sample collection, sex, age, municipality of residence, and symptoms. For cDNA synthesis, the ProtoScript II First Strand cDNA Synthesis kit (NEB) was used following the manufacturer's instructions. The generated cDNA was subjected to multiplex PCR sequencing using Q5 High Fidelity Hot-Start DNA Polymerase (NEB) and a set of specific primers designed by the Zibra Project (<https://github.com/zibraproject/zika-pipeline/tree/master/schemes/OROV400/V1>) for sequencing the complete genomes of OROV. Whole genome sequencing was performed using both MiSeq (Illumina) and MinION (Oxford Nanopore Technologies) instruments. In the first case, OROV library preparation was carried out using the KAPA HyperPlus kit (Roche), following the manufacturer's instructions. The normalized library was loaded onto a 300-cycle MiSeq Reagent Micro Kit v2 and run on the MiSeq platform (Illumina). For nanopore sequencing, DNA library preparation was performed using the ligation sequencing kit LSK109 (Oxford Nanopore Technologies) and the native barcoding kit EXP-NBD196 (Oxford Nanopore Technologies). Sequencing libraries were loaded into an R9.4 flow cell (Oxford Nanopore Technologies).

## **Generation of consensus sequences**

Raw files were basecalled and demultiplexing was done using Guppy v.6.0 (Oxford Nanopore Technologies). Consensus sequences were generated by a hybrid approach using the Genome Detective online tool (<https://www.genomedetective.com/>) (17). The newly generated OROV sequences were deposited in GenBank and will be made available after acceptance.

## **Phylogenetics analysis**

The 133 novel complete OROV sequences of S, M, and L genomic segments generated in this study were combined with corresponding segments of all published full-length OROV sequences available in NCBI up to July 2024 (S=376 sequences, M=231 sequences, and L=303 sequences). The sequences from two fatal cases from the state of Bahia (Brazil) collected in March and May 2024, along with one from Mato Grosso, were also included (18). Sequence alignment of each dataset was performed using MAFFT (15) and manually curated to remove artifacts using AliView (19). Each viral segment dataset was checked for potential recombination by the RDP5 program (20). These global datasets were used to infer Maximum Likelihood (ML) phylogenetic trees using IQ-TREE version 2 (21) under the HKY nucleotide substitution model, which was inferred by the ModelFinder application. Branch support was assessed using the approximate likelihood-ratio test based on bootstrap and the Shimodaira–Hasegawa-like procedure with 1,000 replicates.

Three different subdatasets containing only the 2022-2024 extra-Amazon sequences of S (n=162), M (n=162), and L (n=162) segments, were used to infer spatiotemporal spread patterns from continuous spatially-explicit phylogeographic reconstructions using BEAST v1.10.4 (22) and Seraphim (REF). Before phylogeographic analysis, each subdataset was also assessed for molecular clock signal using the root-to-tip regression method available in TempEst v1.5.3 (23) following the removal of potential outliers that may violate the molecular clock assumption. We accepted temporal structure when the correlation coefficient was  $>0.2$ . We modeled the phylogenetic diffusion and spread of OROV within Brazil by analyzing localized transmission (between Brazilian regions) using a flexible relaxed random walk diffusion model (24) that accommodates branch-specific variation in rates of dispersal, with a Cauchy distribution and a jitter window size of 0.01 (25). For each sequence, latitude and longitude coordinates of the sample were considered. MCMC analyses were set up in BEAST v1.10.4, running in duplicate for 50 million interactions and sampling every 10,000 steps in the chain. Convergence for each run was assessed in Tracer v1.7.1 (effective sample size for all relevant model parameters  $>200$ ) (26). Maximum clade credibility trees for each run were summarized using TreeAnnotator after discarding the initial 10% as burn-in. Finally, we used the R package seraphim (27) to extract and map spatiotemporal information embedded in the posterior trees.

To better understand the global dissemination of a specific Brazilian sublineage from 2022-2024, we expanded our dataset for each segment to include genome sequences recently isolated in Peru and Italy. We then constructed time-scaled global tree topologies and performed discrete ancestral state reconstruction (of locations) using the *mugration* package extension of TreeTime under a GTR model (28). Using a custom Python script, we tracked the number of state changes by iterating over each phylogeny from the root to the external tips. We recorded state changes whenever an internal node transitioned from one country to a different country in its child node or tip(s). The timing of these transition events was documented, providing estimates for import or export events (29).

## Results

Between late 2022 and early 2024, the Brazilian states of Acre, Amazonas, Rondônia, and Roraima, located in the western Amazon region, reported a sharp increase in the incidence of OROV human cases (11). Concurrently, there was a substantial increase in the number of real-time RT-PCR tests conducted across the country, reflecting heightened screening efforts (**Figure 1a**). In 2020, initial screening efforts focused primarily on the northern region of Brazil, with the Roraima and Pará states accounting for the majority of the 238 tests conducted (8). At the same time, a few positive cases were detected in Amapá, Amazonas, Pará, Piauí, and Rondônia, signaling the early spread of OROV. By 2021, the number of tests surged to 1,466, with significant increases in states outside the Amazon basin such as Minas Gerais and Ceará. Positive cases were reported predominantly in Amapá, Pará, and Piauí (11). The trend of increased testing continued into 2022, with 588 tests conducted, marking notable expansions in Midwestern and Northeastern Brazilian states. In 2023, the screening efforts intensified further, with 5,280 tests conducted nationwide, with significant testing numbers in Bahia, Goiás, Rio de Janeiro, and Tocantins, reflecting widespread concern. Positive cases were detected in multiple states, including Acre, Maranhão, Mato Grosso, Pará, Piauí, Rio Grande do Norte, Rondônia, Roraima, and

Tocantins (**Figure 1a**) (11). By early 2024, screening efforts reached an unprecedented level, with 54,428 tests conducted across numerous states (**Figure 1a**). As shown in the inset panel, the positive rate has nearly doubled, increasing from 0.059 in 2020 to 0.1 in 2024. The states of Espírito Santo, Minas Gerais, Bahia, and Goiás reported the highest testing numbers outside the Amazon basin (11). Within this period, cumulative positive cases were highest within Rondônia (n=1,747), Bahia (n=837), Espírito Santo (n=416), and Roraima (n=244) (**Figure 1b**).

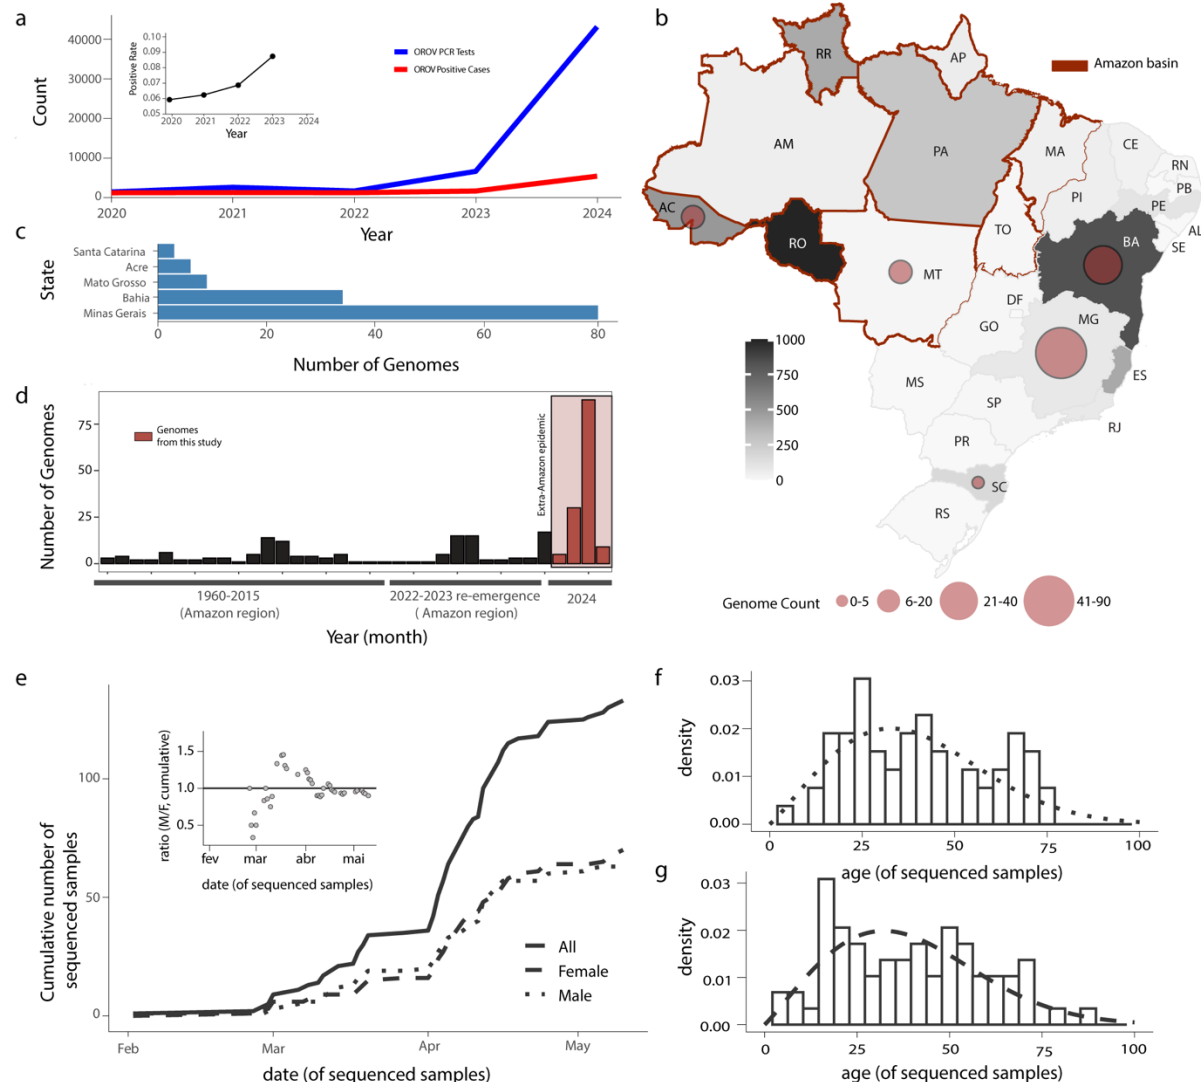

**Figure 1. Distribution and Epidemiological Insights of OROV Clinical Cases Detected Beyond the Amazon Basin.** a) Weekly notified OROV PCR tests and positive cases normalized per 100K individuals per region from 2020 to 2024. The inset panel shows the positive rate (ratio of positive cases to PCR tests) over the same period, with the y-axis scaled from 0.05 to 0.1 to highlight the variations; b) Map of Brazil showing the number of OROV new sequences by state. The color and size of the circles indicates the number of new genomes generated in this study; c) Number of new OROV genomes per state obtained in this study (Santa Catarina n=3; Acre n=6; Mato Grosso n=9; Bahia n=34; Minas Gerais n=81); d) Number of genomes generated in this study compared to the number of Brazilian OROV sequences available on the GenBank up to 31st July, 2024. Bars are months, months with 0 sampling are not shown; e) Cumulative OROV cases in absolute (full line) and by gender (male dotted, female dashed) of samples from 2024 for which gender metadata was available; the inner panel shows the gender ratio (M/F) per date; f-g) Observed (bars) and theoretical (lines) age-distributions for males (f) and females (g) of samples from 2024 for

which gender metadata was available. Fitted theoretical distributions were Weibul (male: shape 2.11, scale 44.39, mean 39.15; female: shape 2.07, scale 44.22, mean 39.16).

Five Brazilian states were represented in the 133 novel genome sequences: Acre (N=6, northwest), Bahia (N=34, northeast), Mato Grosso (N=9, midwest), Minas Gerais (N=81, southeast) and Santa Catarina (N=3, south) (**Figure 1c,a**). This sampling covered a wide spatial range outside the Amazon basin (**Figure 1a**), represented the most time-intensive sampling period to date in Brazil (**Figure 1d**) and more than doubled the publicly available Brazilian OROV genomes. The average cycle threshold (CT) for the three genes was 25, ranging from 8 to 36 (**Table S1**). The gender ratio associated with the genome samples was biased towards females in February-March 2024, but converged to 1 into late local autumn (**Figure 1e**). Cumulatively, 53% (n=70) were female and 47% (n=63) were male (**Table S1**), with genders showing a similar age profile (**Figure 1f-g**). Ages ranged from 1 to 89 years, with a median age of ~39 years.

Genome sequences were obtained from all five Brazilian macro-regions (North, South, North East, South East and North East), revealing a north-to-south movement across the country (**Figure 1**). The most frequent symptoms observed among the patients were fever, myalgia, and headache. These symptoms were consistently reported across multiple cases, with some patients also experiencing arthralgia. In addition to the common symptomatic presentations, our study identified three fatal cases associated with OROV infection. Notably, these fatalities occurred in young adult patients who had no reported comorbidities. The detection of these fatal cases suggests that OROV may have a broader clinical impact than previously understood, warranting further investigation into the factors contributing to severe disease outcomes. Point mutations were identified in all three fatal cases, with notable changes observed in the M, and L segments of the viral genome. In the M segment, amino acid changes included I to V at position 13, M to I at position 642, A to T at position 752, and R to K at position 1342. In the L segment, mutations were found at amino acid positions 857 (T to A), 1634 (K to E), and 2206 (N to D). These genetic alterations may be associated with the fatal outcomes observed; however, further in-depth analysis and in vitro studies are essential to elucidate their exact role in the pathogenesis and severity of OROV infections. There was seemingly no evidence that symptoms varied with age or gender (**Figure S1**).

The sequencing procedures yielded an average sequence coverage of 97.7% for segment S, 98.5% for segment M, and 98.32% for segment L (**Table S1**). Using a Generalized Additive Model similar to the one used for other arboviruses (30), we generated response curves for resulting sequence coverage dependent on sample CT. As expected, both observed (**Table S1**) and estimated sequence coverage were negatively correlated with CT value (**Figure 2a**). Segment M overperformed and segment S underperformed in sequence coverage independently of CT value (albeit only marginally). Segment M was the least sensitive to CT value, showing consistent sequence coverage across sample CT. The states of Bahia and Minas Gerais (~26 and ~61% of samples, respectively) represented extremes of model output, with consistently lower sequence coverage for Bahia and higher coverage for Minas Gerais, independently of sample CT and across all genome segments (**Figure S2**). Prolonged intervals between symptom onset and sample collection led to increased CT values (**Figure 2b**), suggesting a decline in viral RNA quantity and consequently sample quality over time, underscoring the critical importance of



minimizing the time between symptom onset and sample collection to ensure the acquisition of high-quality sequencing data. Additionally, considering the segmented nature of this viral genome, we investigated the potential presence of recombination events within the three different genome segments. We identified 21 recombination events: 17 separating the S and M segments, 7 separating the S and L segments, and 11 separating the M and L segments (**Figure 2c**).

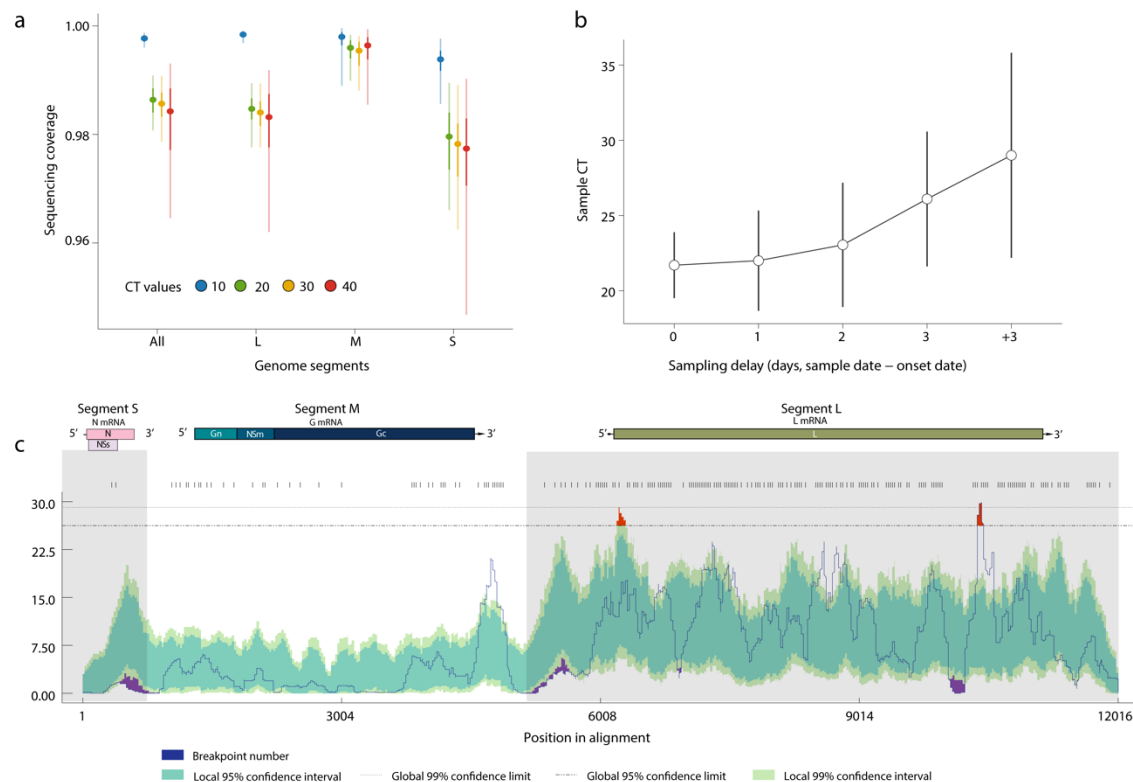

**Figure 2. Sequencing coverage and recombination plot and across genome segments.** a) Summary of estimated sequence coverage dependent on sample CT using a Generalized Additive Model. Shown are the mean (points) and 95% CI (ranges) for model estimates given selected values of CT (10, 20, 30, 40, in color) for all segments separately and together; b) Sample CT values (mean as points, standard deviation as ranges) plotted against the sampling delay (days between symptom onset and sample collection). c) Black lines above the figure indicate detected breakpoint positions. The green pearl aqua region shows the 95% confidence interval for expected breakpoint clustering under random recombination, while the tea green region represents the 99% confidence interval. The lower and upper dashed lines denote the 95% and 99% confidence intervals, respectively. The blue line represents the total number of breakpoints per 200-nucleotide window across the genome. Regions where the blue line exceeds the green pearl aqua area are highlighted in orange as recombination hotspots. Regions where the blue line falls below the tea green area are marked in purple as recombination cold spots.

To investigate the recent evolution of the three independent segments of the OROV genome, we constructed independent phylogenetic trees to elucidate their relationships with other isolates. Our analysis revealed that the The novel OROV genome sequences sampled in 2024 clustered with sequences from the 2022-2024 epidemic into a monophyletic clade, with strong bootstrap support (values of 1.0) across all three genomic segments (**Figure 3a-c**).

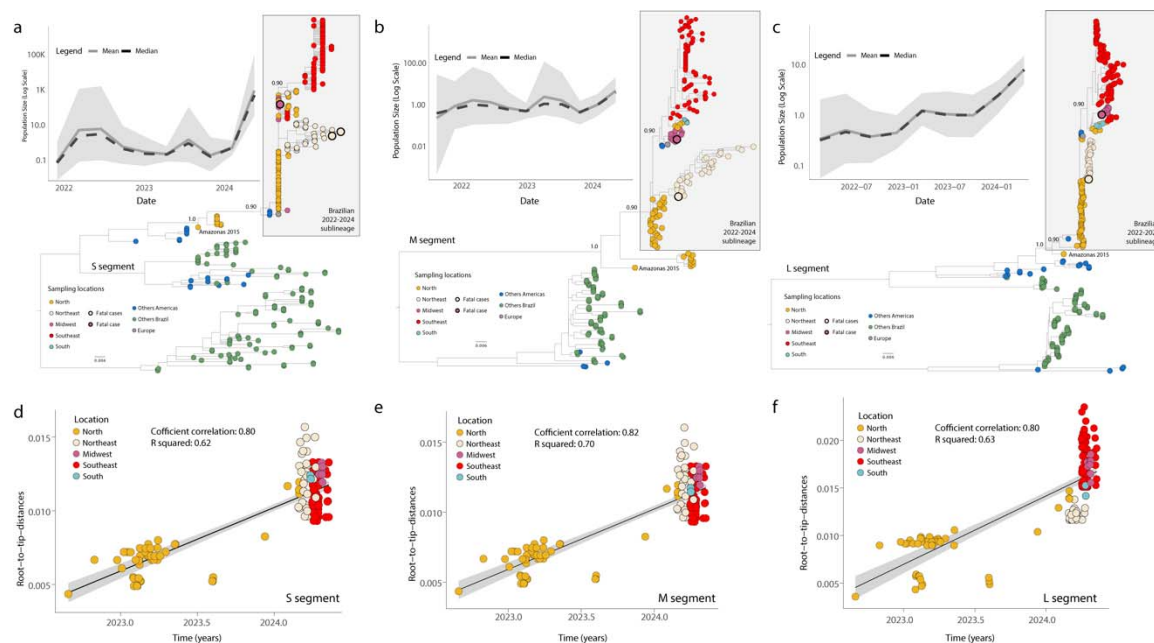

**Figure 3. Molecular Evolution and Demographic History of OROV Segments S, M, and L.** a1, b1 and c1) Population size of OROV infections (Log scale) over time estimated under the coalescent-based Bayesian Skygrid (BSKG) model (posterior median = solid lines, 95% HPD = pale areas) per each segments; a2, b2 and c2) Maximum likelihood phylogenetic trees of the three independent OROV segments S (n = 376), M (n = 231) (a), L (n = 303). Tips are color-coded according to the legend in the left corner; a3, b3 and c3) Regression of sequence sampling dates against root-to-tip genetic distances in a maximum likelihood phylogeny of the Brazilian 2022-2024 expansion clade (n=254).

This monophyletic clade included a basal sequence from the locality of Tefé, Amazonas state, sampled in 2015, indicating a likely Amazonian origin. Consistent with recent findings, this evidence suggests that the reassortant lineage, possessing L and S segments from one virus and an M segment from another, has rapidly expanded to other regions, following a north-to-south movement across the country (**Figure 3a-c**). Detailed analysis of the epidemic expansion, based on effective population size, revealed oscillations over time, with a sharp increase at the beginning of 2024 (**Figure 3a-c, inner plots**), coinciding with the timing of the national surge in OROV cases (**Figure 1**) (8). In addition to that, the phylogenetic trees for the S, M, and L segments (**Figure 3a-c**) revealed two main lineages. The first lineage appeared to be primarily composed of sequences from the northern and northeastern regions, while the second lineage was associated with the southeastern and southern regions. This geographical separation might reflect regional diversification of the virus as it spread outside the Amazon basin.

The observed topological discordance among the phylogenetic trees of different genomic segments indicated the likelihood of multiple reassortment or recombinant events, supporting the notion that reassortment/recombination is a common and potentially significant evolutionary mechanism in bunyaviruses. A recent preprint manuscript provides more information on the potential reassortment events on genomes from the Amazon Basin (Naveca et al. ), so this will not be covered in detail in our manuscript, focusing mostly on the largest 2024 outbreak and first deaths happening for the first time outside the Amazon Basin in Brazil.

To retrospectively reconstruct viral movements across the country, we utilized smaller data sets derived from each genomic segment individually, focusing exclusively on the Brazilian 2022-2024 sublineage (**Figure 3 a-c**). An analysis of substitution rate constancy revealed a strong correlation between sampling time and root-to-tip divergence in all three data sets (**Figure 3 g-i**), which validated the use of molecular clock models for inferring evolutionary parameters.

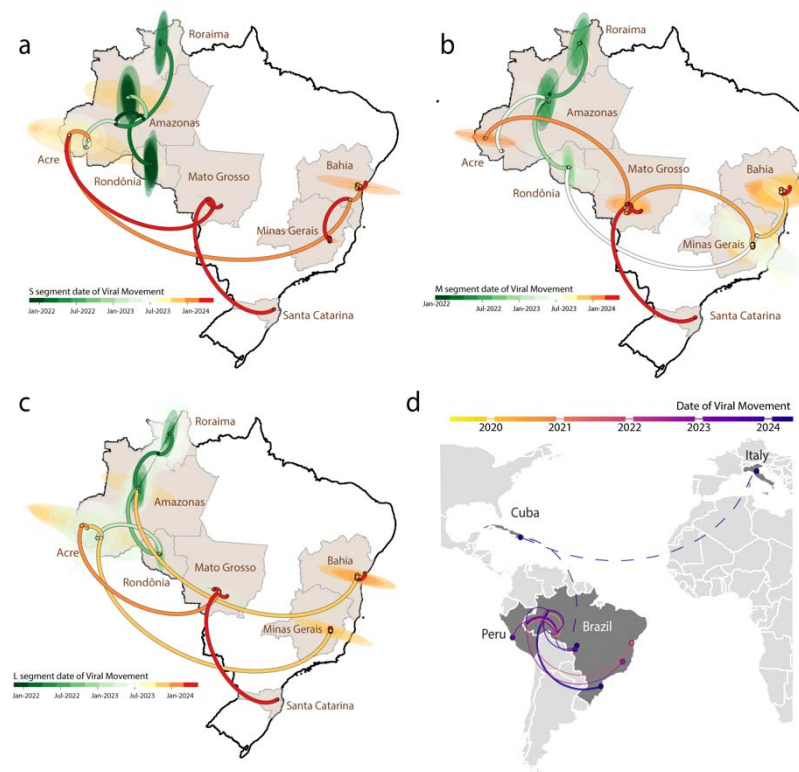

**Figure 4. Inferred Viral Dissemination Patterns of OROV in Brazil and Globally.** a-c) Phylogeographic reconstruction of the spread of OROV (segments S, M, and L) in Brazil. Circles represent nodes of the maximum clade credibility phylogeny and are colored according to their inferred time of occurrence. Shaded areas represent the 80% highest posterior density interval, depicting the uncertainty of the phylogeographic estimates for each node. Solid curved lines denote the links between nodes and the directionality of movement; d) Dissemination patterns of OROV within the Americas and Europe obtained from inferred ancestral-state reconstructions annotated and colored by region. The destination countries of viral exchange routes are shown with dots, with curves indicating the routes from the country of origin to the destination country in a counterclockwise direction. The dashed lines indicate the probable direction of dispersal concluded without evidence due to the paucity of genomes from Cuba.

We estimated that the mean time of origin for this Brazilian 2022-2024 sublineage was in early November 2021, with a 95% highest posterior density (HPD) interval ranging from early-August 2021 to early January 2022. These findings suggest continuous transmission within the Amazon basin (**Figure 4a-c**). Likely introduced in early 2015, this sublineage remained undetected due to insufficient active surveillance at the national level, initially spreading from the northern part of the country (Amazon basin) and subsequently moving towards the northeastern (Bahia state), midwestern (Mato Grosso state), southeastern (Minas Gerais state), and southern (Santa Catarina state) regions (**Figure 4a-c**). We expanded the dataset related to this Brazilian 2022-2024 sublineage to include international genome

sequences recently isolated in Peru and Italy, and reran the phylodynamic approach. This global reconstruction showed that OROV likely initially moved north to south within Brazil and then crossed borders to reach Peru (**Figure 4d**). Case reports recently detected in Italy and associated with the sequences included in this analysis, have been demonstrated to be associated with returning travelers from Cuba, but genomes from this country are currently unavailable. It is tempting to conclude that OROV moved into Cuba sometime in between the events depicted in **Figure 4d** before being exported into Europe.

## Discussion

The emergence and spread of the novel reassortant OROV lineage between 2022 and 2024 in the Brazilian Amazon region highlight significant insights into the virus's evolutionary dynamics and the role of ecological and human factors in its dissemination (9, 10). Our study, along with recent findings (9, 10), underscores the importance of genomic surveillance and phylogenetic analysis in tracing the origin and movement of viral pathogens. The phylogenetic analyses from our study revealed that the OROV sequences sampled between 2022 and 2024 clustered into a highly supported monophyletic clade, with origins tracing back to a basal sequence from Tefé, Amazonas, Brazil, sampled in 2015. This indicates a likely Amazonian origin for this clade. Our findings are consistent with the emergence of a novel reassortant lineage containing the M segment from viruses detected in the eastern Amazon region and the L and S segments from viruses found in Peru, Colombia, and Ecuador (9). This reassortant lineage appears to have emerged in the central region of the Amazonas state between 2010 and 2014, demonstrating a long-range silent dispersion during the latter half of the 2010s. Reassortment, a crucial evolutionary mechanism in bunyaviruses, facilitates genetic diversity and adaptability. Our study identified approximately 21 reassortment events among the different genome segments, supporting the role of reassortment in the evolutionary history of OROV (9). These events likely contributed to the virus's ability to adapt to new ecological niches and hosts, fueling its spread across different regions of Brazil. The sharp increase in OROV cases in different Brazilian regions along with the concurrent rise in real-time RT-PCR testing, reflects heightened surveillance and detection efforts underscoring the widespread concern and the proactive measures taken to monitor this emerging pathogen.

Our genome-based surveillance approach, which sequenced 133 genome samples from various Brazilian states, revealed a clear north-to-south movement of the virus within the country. The peak of OROV transmissions coincided with the rainy season in the Amazon basin, suggesting that environmental factors may play a significant role in the virus's transmission dynamics. Deforestation and climate change are pivotal factors contributing to the spread of OROV beyond the Amazon basin (31, 32). The alteration of ecosystems through deforestation disrupts natural habitats and promotes the migration of vectors, such as midges, into new areas (33). Climate change exacerbates this by altering weather patterns and creating favorable conditions for vector proliferation (34). These ecological changes facilitate the movement of OROV from its traditional Amazonian confines to other regions of Brazil and beyond. Recent studies have shown that increased deforestation rates and rising temperatures in the Amazon basin correlate with the expanded range of vector species capable of transmitting OROV (9, 35-39). This north-to-south dissemination pattern highlights the importance of

addressing environmental and climate-related factors in controlling the spread of arboviruses. The prolonged cryptic circulation of the virus emphasizes the critical need for robust, active screening programs to monitor and control the spread of such pathogens effectively. The detection of three fatal cases associated with OROV infection, even in patients without reported comorbidities, indicates a potentially broader clinical impact than previously understood. This highlights the need for further research into the factors contributing to severe disease outcomes and the development of effective treatment strategies. Moreover, the identification of long-range OROV migrations facilitated by human activities, as well as the virus's expansion beyond Brazilian borders to Peru, Cuba, and subsequently Europe, underscores the global implications of this emerging pathogen. The role of climate change in the expansion of vectors into new regions, coupled with increased human mobility, necessitates a coordinated international response to monitor and control the spread of OROV and other arboviruses.

Our study, in conjunction with recent research, emphasizes the critical need for continuous and widespread genomic surveillance. By understanding the evolutionary and epidemiological patterns of OROV, we can better anticipate and mitigate future outbreaks, ensuring more effective public health responses both within Brazil and globally. This approach will be instrumental in managing the ongoing spread of OROV and preparing for potential future threats posed by similar viral pathogens.

**Author Contributions:** Conceptualization: V.F., J.L., T.d.O., L.C.J.A., and M.G.; Methodology: F.C.M.I., F.M.P., E.C.O., J.T.N.R., M.H.M., V.F., T.E.R.A., N.R.G., L.M.R.T., M.K.A.G., V.B.M., A.A.R., A.R., A.G.F., A.L.S.M., B.M.N.F., C.F.C.A., D.S.P., F.G.M.L., F.V.M.S., G.C.P., H.T., J.D.,P.,C.A., K.M.F.M., K.R.V., L.C.S., L.C.M.S., L.C.V.F., L.O.M., M.A.C., M.S.O., M.P.D.A., M.C., M.T.L., M.A.P., M.L.C.R., P.E.S.S., P.R., R.S.A., R.S., R.T.G., R.V.C., S.G., S.C.F.S., S.A.A.B., S.H.S.P.P., S.I.R.A., S.F.S., W.V.V., D.P.M., E.C.H., T.d.O., J.L., L.C.J.A., and M.G.; Investigation: F.C.M.I., F.M.P., E.C.O., J.T.N.R., M.H.M., V.F., T.E.R.A., N.R.G., L.M.R.T., M.K.A.G., V.B.M., A.A.R., A.R., A.G.F., A.L.S.M., B.M.N.F., C.F.C.A., D.S.P., F.G.M.L., F.V.M.S., G.C.P., H.T., J.D.,P.,C.A., K.M.F.M., K.R.V., L.C.S., L.C.M.S., L.C.V.F., L.O.M., M.A.C., M.S.O., M.P.D.A., M.C., M.T.L., M.A.P., M.L.C.R., P.E.S.S., P.R., R.S.A., R.S., R.T.G., R.V.C., S.G., S.C.F.S., S.A.A.B., S.H.S.P.P., S.I.R.A., S.F.S., W.V.V., D.P.M., E.C.H., T.d.O., J.L., L.C.J.A., and M.G.; Data curation: V.F., J.L., and M.G.; Original draft preparation: J.L., M.G.; Review and editing: F.C.M.I., F.M.P., E.C.O., J.T.N.R., M.H.M., V.F., T.E.R.A., N.R.G., L.M.R.T., M.K.A.G., V.B.M., A.A.R., A.R., A.G.F., A.L.S.M., B.M.N.F., C.F.C.A., D.S.P., F.G.M.L., F.V.M.S., G.C.P., H.T., J.D.,P.,C.A., K.M.F.M., K.R.V., L.C.S., L.C.M.S., L.C.V.F., L.O.M., M.A.C., M.S.O., M.P.D.A., M.C., M.T.L., M.A.P., M.L.C.R., P.E.S.S., P.R., R.S.A., R.S., R.T.G., R.V.C., S.G., S.C.F.S., S.A.A.B., S.H.S.P.P., S.I.R.A., S.F.S., W.V.V., D.P.M., E.C.H., T.d.O., J.L., L.C.J.A., and M.G.; Visualization: V.F., J.L., and M.G. All authors have read and agreed to the published version of the manuscript.

**Acknowledgments:** This study was supported by the National Institutes of Health USA grant U01 AI151698 for the United World Arbovirus Research Network (UWARN), the CRP-ICGEB RESEARCH GRANT 2020 Project CRP/BRA20-03, Contract CRP/20/03, and the Rede Unificada de Análises Integradas de Arbovírus de Minas Gerais (REDE UAI-ARBO-MG), financed by Fundação de Amparo à Pesquisa do Estado de Minas Gerais (FAPEMIG), grant number RED-00234-23. M. Giovanetti's funding is provided by PON "Ricerca e Innovazione" 2014-2020. T.E.R.A. is supported by Conselho Nacional de Desenvolvimento Científico e Tecnológico (CNPq) under the process number 153597/2024-0. F.C.M.I. is

supported by FAPEMIG under process number BIP-00123-23. The authors would also like to acknowledge the Global Consortium to Identify and Control Epidemics – CLIMADE (<https://climade.health/>).

**Conflicts of Interest:** The authors declare no conflict of interest.

# Supplementary figures

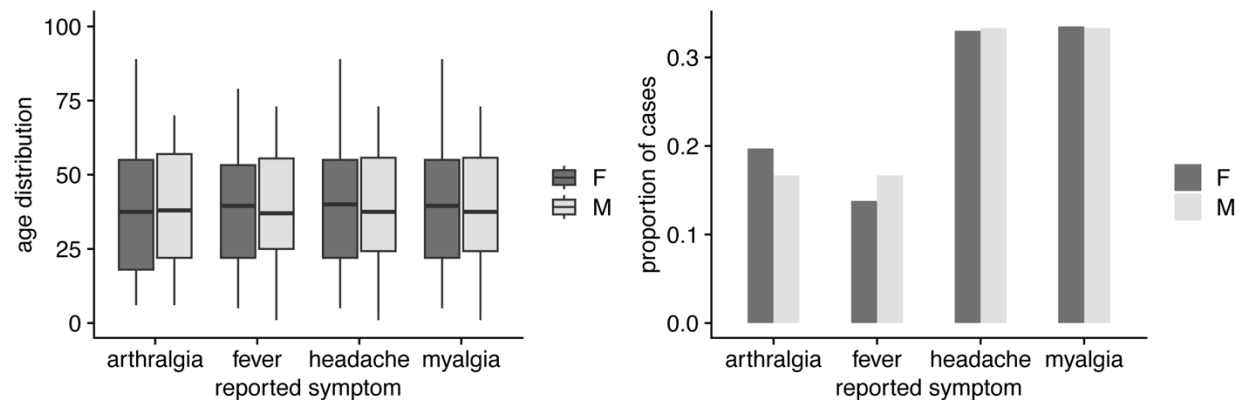

**Figure S1. Symptoms versus age and gender.** The figure displays the (left) age distribution of cases reported with different symptoms and (b) proportion of cases reporting different symptoms, both disaggregated by gender. Data includes the metadata for the sequenced samples.

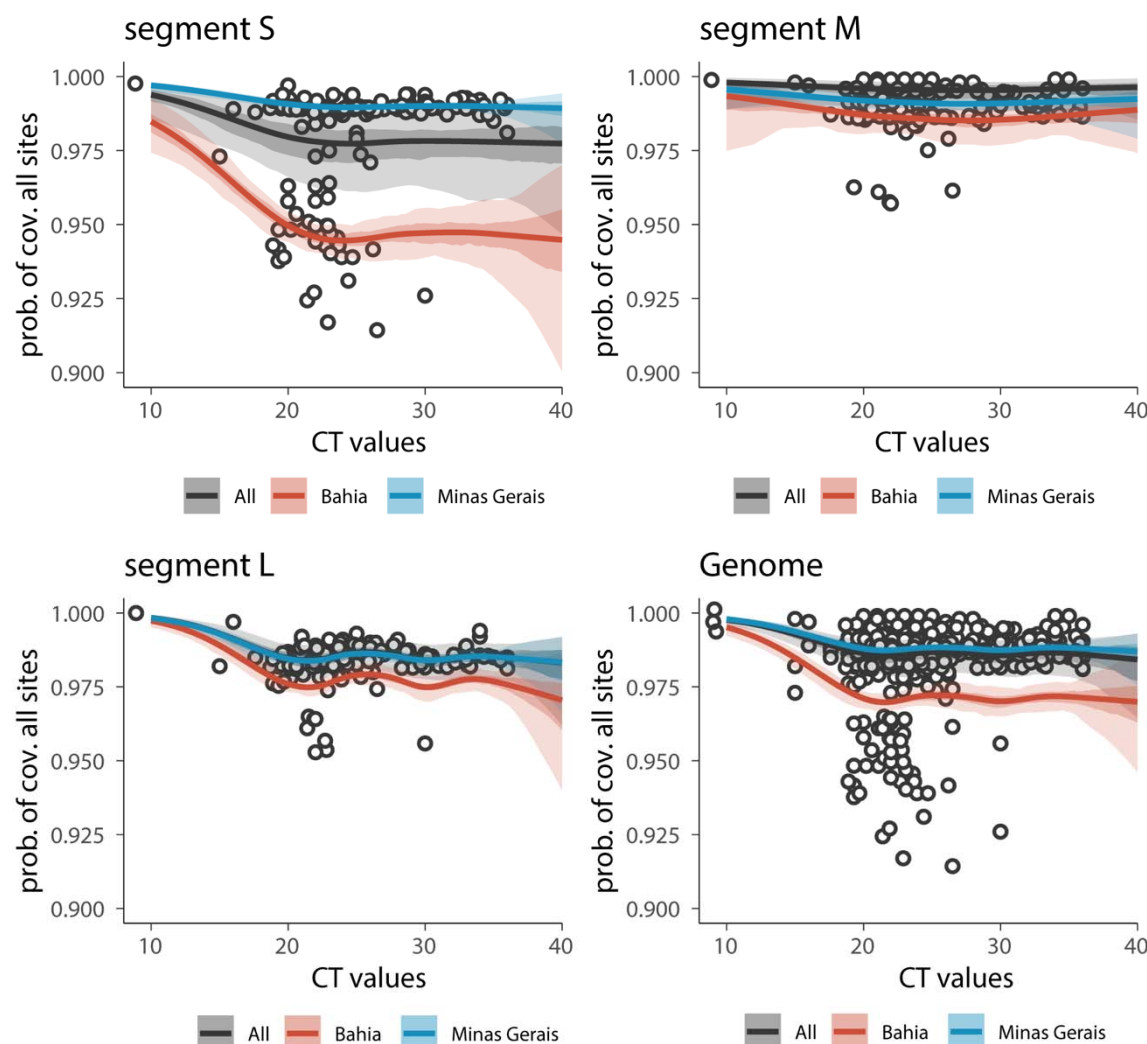

**Figure S2. Sequence Coverage Probability Across Genome Segments in Different Brazilian States.** The figure displays the probability of coverage for all sites across four different genome segments (S, M, L, and the entire genome) in relation to the CT value. The probability was estimated using a Generalized Additive Model (GAM; as done previously e.g. for CHIKV sequencing data [Giovannetti et al Emerg Infect Dis. 2023;29(9):1859-1863]). The GAM was defined with a binomial family, with coverage modelled as the proportion of sites recovered from sequencing, using sample state (Brazilian state) as random effect. Solutions presented (in color) include the specific ones for the two states with most sequencing (Bahia, red; Minas Gerais, blue) and the general model output (gray).

## References

1. International Committee on Taxonomy of Viruses (ICTV). Available at: <https://ictv.global/taxonomy/>. Accessed on 24 July 2024.
2. Elliott RM. Orthobunyaviruses: recent genetic and structural insights. *Nat Rev Microbiol*. 2014 Oct;12(10):673-85. doi: 10.1038/nrmicro3332. Epub 2014 Sep 8. PMID: 25198140.
3. Anderson CR, Spence L, Downs WG, Aitken TH. Oropouche virus: a new human disease agent from Trinidad, West Indies. *Am J Trop Med Hyg*. 1961 Jul;10:574-8. doi: 10.4269/ajtmh.1961.10.574. PMID: 13683183.
4. Sakkas H, Bozidis P, Franks A, Papadopoulou C. Oropouche Fever: A Review. *Viruses*. 2018 Apr 4;10(4):175. doi: 10.3390/v10040175.
5. Mourão MP, Bastos MS, Gimaque JB, Mota BR, Souza GS, Grimmer GH, Galusso ES, Arruda E, Figueiredo LT. Oropouche fever outbreak, Manaus, Brazil, 2007-2008. *Emerg Infect Dis*. 2009 Dec;15(12):2063-4. doi: 10.3201/eid1512.090917.
6. Pinheiro FP, Rocha AG, Freitas RB, Ohana BA, Travassos da Rosa AP, Rogério JS, Linhares AC. Meningite associada às infecções por vírus Oropouche [Meningitis associated with Oropouche virus infections]. *Rev Inst Med Trop Sao Paulo*. 1982 Jul-Aug;24(4):246-51. Portuguese.
7. Vasconcelos HB, Nunes MR, Casseb LM, Carvalho VL, Pinto da Silva EV, Silva M, Casseb SM, Vasconcelos PF. Molecular epidemiology of Oropouche virus, Brazil. *Emerg Infect Dis*. 2011 May;17(5):800-6. doi: 10.3201/eid1705.101333.
8. Pan American Health Organization (PAHO). Epidemiological Alert Oropouche in the Region of the Americas: vertical transmission event under investigation in Brazil (2024). Available on <https://www.paho.org/pt/documentos/alerta-epidemiologica-oropouche-na-regiao-das-americas-evento-transmissao-vertical-sob>. Accessed on 24 July 2024.
9. Naveca F., et al., Emergence of a novel reassortant Oropouche virus drives persistent human outbreaks in the Brazilian Amazon region from 2022 to 2024. *MedRxiv*, <https://doi.org/10.1101/2024.07.23.24310415>.
10. Scachetti et al., Reemergence of Oropouche virus between 2023 and 2024 in Brazil. *MedRxiv*, <https://doi.org/10.1101/2024.07.27.24310296>.
11. Brazilian Ministry of Health. Oropouche fever. <https://www.gov.br/saude/pt-br/assuntos/saude-de-a-a-z/a/arboviroses/informe-diario>.



12. Giovanetti M, Pinotti F, Zanluca C, Fonseca V, et al. Genomic epidemiology unveils the dynamics and spatial corridor behind the Yellow Fever virus outbreak in Southern Brazil. *Sci Adv*. 2023 Sep;9(35):eadg9204. doi: 10.1126/sciadv.adg9204. Epub 2023 Sep 1. PMID: 37656782; PMCID: PMC10854437.
  
13. Pan American Health Organization (PAHO). Public Health Risk Assessment related to Oropouche Virus (OROV) in the Region of the Americas (2024). Available on <https://www.paho.org/en/documents/public-health-risk-assessment-related-oropouche-virus-orov-region-americas-9-february>. Accessed on 24 July 2024.
  
14. Zhang Y, Liu X, Wu Z, Feng S, Lu K, Zhu W, Sun H, Niu G. Oropouche virus: A neglected global arboviral threat. *Virus Res*. 2024 Mar;341:199318. doi: 10.1016/j.virusres.2024.199318.
  
15. Bandeira AC, Barbosa ACFN, Souza M, Saavedra RC, et al. Clinical profile of Oropouche Fever in Bahia, Brazil: unexpected fatal cases. *Scielo Preprints*, 2024. doi: 10.1590/SciELOPreprints.9342.
  
16. Naveca FG, Nascimento VAD, Souza VC, Nunes BTD, Rodrigues DSG, Vasconcelos PFDC. Multiplexed reverse transcription real-time polymerase chain reaction for simultaneous detection of Mayaro, Oropouche, and Oropouche-like viruses. *Mem Inst Oswaldo Cruz*. 2017 Jul;112(7):510-513. doi: 10.1590/0074-02760160062.
  
17. Vilsker M, Moosa Y, Nooij S, Fonseca V, Ghysens Y, Dumon K, Pauwels R, Alcantara LC, Vanden Eynden E, Vandamme AM, Deforche K, de Oliveira T. Genome Detective: an automated system for virus identification from high-throughput sequencing data. *Bioinformatics*. 2019 Mar 1;35(5):871-873. doi: 10.1093/bioinformatics/bty695.
  
18. Katoh K, Standley DM. MAFFT multiple sequence alignment software version 7: improvements in performance and usability. *Mol Biol Evol*. 2013 Apr;30(4):772-80. doi: 10.1093/molbev/mst010.
  
19. Larsson A. AliView: a fast and lightweight alignment viewer and editor for large datasets. *Bioinformatics*. 2014 Nov 15;30(22):3276-8. doi: 10.1093/bioinformatics/btu531.
  
20. Martin DP, Varsani A, Roumagnac P, Botha G, Maslamoney S, Schwab T, Kelz Z, Kumar V, Murrell B. RDP5: a computer program for analyzing recombination in, and removing signals of recombination from, nucleotide sequence datasets. *Virus Evol*. 2020 Apr 12;7(1):veaa087. doi: 10.1093/ve/veaa087.
  
21. Minh BQ, Schmidt HA, Chernomor O, Schrempf D, Woodhams MD, von Haeseler A, Lanfear R. IQ-TREE 2: New Models and Efficient Methods for Phylogenetic Inference in the Genomic Era. *Mol Biol Evol*. 2020 May 1;37(5):1530-1534. doi: 10.1093/molbev/msaa015. Erratum in: *Mol Biol Evol*. 2020 Aug 1;37(8):2461. doi: 10.1093/molbev/msaa131.

22. Suchard MA, Lemey P, Baele G, Ayres DL, Drummond AJ, Rambaut A. Bayesian phylogenetic and phylodynamic data integration using BEAST 1.10. *Virus Evol.* 2018 Jun 8;4(1):vey016. doi: 10.1093/ve/vey016.
23. Rambaut A, Lam TT, Max Carvalho L, Pybus OG. Exploring the temporal structure of heterochronous sequences using TempEst (formerly Path-O-Gen). *Virus Evol.* 2016 Apr 9;2(1):vew007. doi: 10.1093/ve/vew007.
24. Lemey P, Rambaut A, Welch JJ, Suchard MA. Phylogeography takes a relaxed random walk in continuous space and time. *Mol Biol Evol.* 2010 Aug;27(8):1877-85. doi: 10.1093/molbev/msq067.
25. Dellicour S, Gill MS, Faria NR, Rambaut A, Pybus OG, Suchard MA, Lemey P. Relax, Keep Walking - A Practical Guide to Continuous Phylogeographic Inference with BEAST. *Mol Biol Evol.* 2021 Jul 29;38(8):3486-3493. doi: 10.1093/molbev/msab031.
26. Rambaut A, Drummond AJ, Xie D, Baele G, Suchard MA. Posterior Summarization in Bayesian Phylogenetics Using Tracer 1.7. *Syst Biol.* 2018 Sep 1;67(5):901-904. doi: 10.1093/sysbio/syy032.
27. Dellicour S, Rose R, Faria NR, Lemey P, Pybus OG. SERAPHIM: studying environmental rasters and phylogenetically informed movements. *Bioinformatics.* 2016 Oct 15;32(20):3204-3206. doi: 10.1093/bioinformatics/btw384.
28. Sagulenko P, Puller V, Neher RA. TreeTime: Maximum-likelihood phylodynamic analysis. *Virus Evol.* 2018 Jan 8;4(1):vex042. doi: 10.1093/ve/vex042. PMID: 29340210; PMCID: PMC5758920.
29. Giovanetti M, Slavov S, Fonseca V, et al. Genomic epidemiology of the SARS-CoV-2 epidemic in Brazil. *Nat Microbiol* 7, 1490–1500 (2022). <https://doi.org/10.1038/s41564-022-01191-z>.
30. Giovanetti M, Vazquez C, Lima M, Castro E, Rojas A, Gomez de la Fuente A, et al. Rapid Epidemic Expansion of Chikungunya Virus East/Central/South African Lineage, Paraguay. *Emerg Infect Dis.* 2023;29(9):1859-1863. <https://doi.org/10.3201/eid2909.230523>.
31. Burkett-Cadena ND, Vittor AY. Deforestation and vector-borne disease: Forest conversion favors important mosquito vectors of human pathogens. *Basic Appl Ecol.* 2018 Feb;26:101-110. doi: 10.1016/j.baae.2017.09.012. Epub 2017 Sep 23. PMID: 34290566; PMCID: PMC8290921.
32. Lorenz C, de Oliveira Lage M, Chiaravalloti-Neto F. Deforestation hotspots, climate crisis, and the perfect scenario for the next epidemic: The Amazon time bomb. *Sci Total Environ.* 2021 Aug 20;783:147090. doi: 10.1016/j.scitotenv.2021.147090. Epub 2021 Apr 14. PMID: 33872911; PMCID: PMC8721566.

33. Ellwanger JH, Kulmann-Leal B, Kaminski VL, Valverde-Villegas JM, Veiga ABGD, Spilki FR, Fearnside PM, Caesar L, Giatti LL, Wallau GL, Almeida SEM, Borba MR, Hora VPD, Chies JAB. Beyond diversity loss and climate change: Impacts of Amazon deforestation on infectious diseases and public health. *An Acad Bras Cienc.* 2020 Apr 17;92(1):e20191375. doi: 10.1590/0001-3765202020191375. PMID: 32321030.
34. Rocklöv, J., Dubrow, R. Climate change: an enduring challenge for vector-borne disease prevention and control. *Nat Immunol* 21, 479–483 (2020). <https://doi.org/10.1038/s41590-020-0648-y>
35. Nunes, M. R. T., Silva, S. P., Carvalho, V. L., Vasconcelos, J. M., Da Silva, D. E. A., & Oliveira, L. F. et al. Emergence of new insect-restrictive viruses in the Amazon region. *Genome Announcements*, 2016; 3(2): e00131-15. doi:10.1128/genomeA.00131-15.
36. Lowe, R. et al. Tackling climate change and deforestation to protect against vector-borne diseases. *Nature Microbiology*, 2023; 8, 2220–2222. doi:10.1038/s41564-023-01533-5.
37. Bloomfield, L. S. P., McIntosh, T. L., & Lambin, E. Why deforestation and extinctions make pandemics more likely. *Nature*, 2020. <https://www.nature.com/articles/d41586-020-02341-1>.
38. Vittor, A. Y. et al. Deforestation can facilitate the emergence and spread of some infectious diseases."Climate Feedback, 2009. <https://climatefeedback.org/deforestation-can-facilitate-the-emergence-and-spread-of-some-infectious-diseases>.
39. Jones, K. E., Patel, N. G., Levy, M. A., Storeygard, A., Balk, D., Gittleman, J. L., & Daszak, P. Global trends in emerging infectious diseases. *Nature*, 2008; 451(7181), 990-993. doi:10.1038/nature06536.
